# Supplementary material for: Factor people into tiger conservation
Source: Springer Nature journal article supplement (doi:10.1038/522287a), 2015-06-16
Supplement: 41586_2015_BF522287a_MOESM197_ESM.pdf [file 41586_2015_BF522287a_MOESM197_ESM.pdf]

---

**Supplementary information to:  
Factor people into tiger conservation**

Full list of co-signatories to a Correspondence published in Nature 522, 287 (2015);  
<http://dx.doi.org/10.1038/522287a>

**Achyut Aryal, Weihong Ji** *Massey University, Auckland, New Zealand.*

*a.aryal@massey.ac.nz*

**Uttam Babu Shrestha** *University of Southern Queensland, Toowoomba, Australia.*

**Roberta Bencini** *University of Western Australia, Perth, Australia.*

**David Raubenheimer** *University of Sydney, Australia.*
